# Supplementary material for: Efficient synthesis of novel disubstituted pyrido[3,4-b]pyrazines for the design of protein kinase inhibitors
Source: Royal Society of Chemistry journal article supplement (doi:10.1039/c5md00424a), 2015-11-19
Supplement: c5md00424a1.pdf [file c5md00424a1.pdf]

## Supplementary Information

# Efficient synthesis of novel disubstituted pyrido[3,4-*b*]pyrazines for the design of protein kinase inhibitors†

Maud Antoine,<sup>‡a</sup> Tilmann Schuster,<sup>b</sup> Irene Seipelt,<sup>b</sup> Babette Aicher,<sup>b</sup> Michael Teifel,<sup>b</sup> Eckhard Günther,<sup>b</sup> Matthias Gerlach<sup>b</sup> and Pascal Marchand<sup>\*a</sup>

<sup>a</sup> *Université de Nantes, Nantes Atlantique Universités, Laboratoire de Chimie Thérapeutique, Cibles et Médicaments des Infections et du Cancer IICiMed EA 1155, UFR des Sciences Pharmaceutiques et Biologiques, 1 rue Gaston Veil, 44035 Nantes, France.*

<sup>b</sup> *Æterna Zentaris GmbH, Weismuellerstrasse 50, 60314 Frankfurt/Main, Germany*

\* E-mail: [pascal.marchand@univ-nantes.fr](mailto:pascal.marchand@univ-nantes.fr); Tel: +33 240 412 874; Fax: +33 240 412 876

## Chemistry

**General methods:** Melting points were determined with an Electrothermal IA9300 digital melting point apparatus and are uncorrected. <sup>1</sup>H and <sup>13</sup>C NMR spectra were recorded on a Bruker Avance 400 spectrometer (400 MHz). Chemical shifts (δ) are expressed in ppm relative to tetramethylsilane as internal standard. NMR signals are described as follows: s=singlet, d=doublet, t=triplet, q=quadruplet, sext=sextuplet, m=multiplet and br=broad. Coupling constants (J) are given in hertz. Infrared spectra (IR) were recorded on a Shimadzu IRAffinity-1 IR-FT spectrophotometer equipped with a MIRacle 10 accessory ATR. Only the most significant absorption bands are reported. Electrospray mass spectrometric analysis was performed on a Waters Acquity UPLC System ZQ 2000 single quadrupole. All tested compounds displayed purity of >97%. All reactions were monitored by thin-layer chromatography (TLC) using 0.2-mm-thick silica gel plates 60 F254 (5735 Merck). Column chromatography was carried out with silica gel 60 (70–230 mesh, ASTM, Merck). Chemicals and solvents used were commercially available. Elemental analyses were performed on a Thermo Scientific Elemental Analyzer Flash EA 1112 and were found to be within ±0.4% of theoretical values.

## Synthesis of halogenated pyrido[3,4-*b*]pyrazine precursors 6a, 6b, 12a, 12b, 16 and 17

### Synthesis of 8-bromo-3-phenylpyrido[3,4-*b*]pyrazine (6a)

#### 8-Bromo-3-phenylpyrido[3,4-*b*]pyrazin-2(1*H*)-one (3)

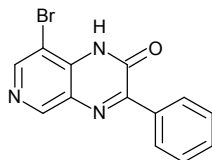

To a solution of 3,4-diamino-5-bromopyridine **2** (3.76 g, 20.0 mmol) in methanol (150 mL) was added methyl oxo(phenyl)acetate (3.90 g, 20.0 mmol) and the reaction mixture was stirred at room temperature for 24 h. The resulting mixture was filtered, and then stirred for more 24 h. The solution was filtered again, the two batches of powder were mixed together and were purified by silica gel column chromatography using dichloromethane/ethanol (19/1) as eluent to give compound **3** as a beige powder (5.74 g, 95%). *R*<sub>f</sub> 0.60 (CH<sub>2</sub>Cl<sub>2</sub>/EtOH 19:1); Mp 253–254 °C; <sup>1</sup>H NMR (400 MHz, DMSO-*d*<sub>6</sub>): δ 8.99 (s, 1H), 8.76 (s, 1H), 8.32–8.27 (m, 2H), 7.59–7.56 (m, 3H); <sup>13</sup>C NMR (100 MHz, DMSO-*d*<sub>6</sub>): δ 157.7 (C), 157.0 (C), 150.7 (CH), 150.2 (CH), 138.1 (C), 135.8 (C), 131.7 (CH), 130.5 (C), 130.4 (2CH), 128.9 (2CH), 106.7 (C); IR (ATR): 3170, 3070, 3028, 1680, 1597, 1533, 1265, 1169, 1009, 937, 732 cm<sup>-1</sup>; MS (ESI) *m/z* (%) = 303.1

(100)  $[M+H]^+$ , 305.1 (95)  $[M+H+2]^+$ . Anal. calcd for  $C_{13}H_8BrN_3O$ : C 51.68, H 2.67, N 13.91. Found: C 51.59, H 2.69, N 14.00.

#### 8-Bromo-2-chloro-3-phenylpyrido[3,4-*b*]pyrazine (**4**)

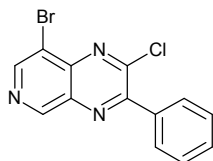

8-Bromo-3-phenylpyrido[3,4-*b*]pyrazin-2(1*H*)-one **3** (5.00 g, 16.5 mmol) was refluxed in phosphorus oxychloride (40 mL) overnight. Then phosphorus oxychloride was removed under reduce pressure, the residue was taken up with dichloromethane (200 mL). An aqueous saturated solution of sodium hydrogenocarbonate (200 mL) was added carefully after cooling with ice bath. The aqueous layer was extracted with dichloromethane, the organic layer was dried over  $Na_2SO_4$ , filtered and then the solvent was removed under reduce pressure. The crude product was purified by silica gel column chromatography using dichloromethane as eluent to give compound **4** as an orange powder (4.81 g, 90%).  $R_f$  0.51 ( $CH_2Cl_2$ ); Mp 158-160 °C;  $^1H$  NMR (400 MHz,  $DMSO-d_6$ ):  $\delta$  9.03 (s, 1H), 8.79 (s, 1H), 8.30-8.28 (m, 2H), 7.61-7.54 (m, 3H);  $^{13}C$  NMR (100 MHz,  $DMSO-d_6$ ):  $\delta$  158.2 (C), 156.4 (C), 150.1 (CH), 149.4 (CH), 138.0 (C), 135.5 (C), 132.0 (CH), 130.4 (2CH), 130.3 (C), 129.0 (2CH), 106.3 (C); IR (ATR): 3042, 3012, 1690, 1589, 1543, 1485, 1194, 1126, 984  $cm^{-1}$ ; MS (ESI)  $m/z$  (%) = 319.9(74)  $[M+H]^+$ , 321.9(100)  $[M+H+2]^+$ , 323.9(22)  $[M+H+4]^+$ . Anal. calcd for  $C_{13}H_7BrClN_3$ : C 48.40, H 2.81, N 13.03. Found: C 48.46, H 2.80, N 12.98.

#### 8-Bromo-2-hydrazino-3-phenylpyrido[3,4-*b*]pyrazine (**5**)

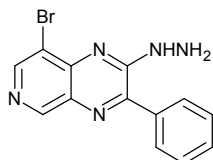

To a solution of 8-bromo-2-chloro-3-phenylpyrido[3,4-*b*]pyrazine **4** (3.00 g, 9.4 mmol) in ethanol (60 mL) was added dropwise hydrazine hydrate (1.14 mL, 37.6 mmol). The mixture was refluxed for 2 h, then cooled and filtered. The crude product was purified by silica gel column chromatography using dichloromethane/ethanol (19/1) as eluent to give the desired compound **5** as a beige powder (2.52g, 85%).  $R_f$  0.62 ( $CH_2Cl_2$ /EtOH 19:1); Mp 213-214 °C;  $^1H$  NMR (400 MHz,  $DMSO-d_6$ ):  $\delta$  8.87 (s, 1H), 8.70 (s, 1H), 7.81-7.77 (m, 2H), 7.60-7.57 (m, 3H);  $^{13}C$  NMR (100 MHz,  $DMSO-d_6$ ):  $\delta$  154.7 (CH), 150.6 (CH), 149.9 (C), 142.1 (C), 139.6 (C), 136.1 (C), 132.8 (CH), 131.4 (2CH), 129.1 (C), 128.6 (2CH), 120.7 (C); IR (ATR): 3280, 3257, 3042, 3021, 1545, 1516, 1429, 1408, 1120, 1012, 930  $cm^{-1}$ ; MS (ESI)  $m/z$  (%) = 317.1 (100)  $[M+H]^+$ , 319.1 (96)  $[M+H+2]^+$ . Anal. calcd for  $C_{13}H_{10}BrN_5$ : C 49.07, H 3.80, N 22.01. Found: C 49.22, H 3.77, N 21.89.

#### 8-Bromo-3-phenylpyrido[3,4-*b*]pyrazine (**6a**)

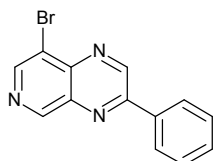

A mixture of 8-bromo-2-hydrazino-3-phenylpyrido[3,4-*b*]pyrazine **5** (1.27 g, 4.0 mmol), manganese dioxide (1.40 g, 16 mmol) and charcoal (1.40 g, 10 mmol) in chloroform (100 mL) was stirred at room

temperature for 24h. The resulting solution was filtered on Celite, and the pad was washed with dichloromethane. The solvent was removed under reduce pressure and the resulting crude product was purified by silica gel column chromatography using dichloromethane as eluent to give compound **6a** as a beige powder (0.74g, 65%).  $R_f$  0.40 ( $\text{CH}_2\text{Cl}_2$ ); Mp 151-152 °C;  $^1\text{H}$  NMR (400 MHz,  $\text{DMSO}-d_6$ ):  $\delta$  9.96 (s, 1H), 9.55 (s, 1H), 8.46-8.42 (m, 2H), 7.70-7.66 (m, 3H);  $^{13}\text{C}$  NMR (100 MHz,  $\text{DMSO}-d_6$ ):  $\delta$  154.5 (CH), 150.3 (CH), 148.8 (CH), 142.4 (C), 138.7 (C), 135.8 (C), 132.3 (CH), 130.2 (2CH), 129.3 (C), 128.9 (2CH), 120.5 (C); IR (ATR): 3062, 3028, 1672, 1562, 1450, 1310, 1207, 1180, 1045, 964  $\text{cm}^{-1}$ ; MS (ESI)  $m/z$  (%) = 287.1 (100)  $[\text{M}+\text{H}]^+$ , 289.1 (100)  $[\text{M}+\text{H}+2]^+$ . Anal. calcd for  $\text{C}_{13}\text{H}_8\text{BrN}_3$ : C 54.57, H 2.82, N 14.69. Found: C 54.64, H 2.83, N 14.60.

**Synthesis of 8-bromo-3-(4-piperidin-1-ylphenyl)pyrido[3,4-b]pyrazine (6b)**, see reference 14

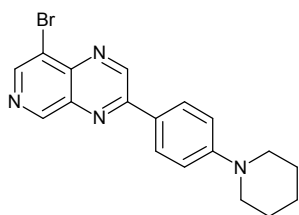

**Synthesis of 5-chloro-2-phenylpyrido[3,4-b]pyrazine (12a)**

**and 5-chloro-2-(4-methoxyphenyl)pyrido[3,4-b]pyrazine (12b)**

2-Phenylpyrido[3,4-b]pyrazine (**11a**)

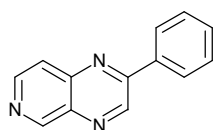

A mixture of 3,4-diaminopyridine **10** (3.00 g, 45.8 mmol) and phenylglyoxal monohydrate (6.11 g, 45.8 mmol) in dioxane (150 mL) was refluxed for 6 h. The solution was then cooled to room temperature and dichloromethane was added. The organic layer was washed with water, dried over sodium sulfate, filtered and the solvents were removed under reduced pressure. The crude product was recrystallized from isopropyl ether to give compound **11a** as a white powder (7.90 g, 83%).  $R_f$  0.62 ( $\text{CH}_2\text{Cl}_2/\text{EtOH}$  19:1); Mp 123-124 °C (lit. [30]: 125-126 °C);  $^1\text{H}$  NMR (400 MHz,  $\text{DMSO}-d_6$ ):  $\delta$  9.78 (s, 1H), 9.54 (d, 1H,  $^4J=0.6$  Hz), 8.89 (d, 1H,  $^3J=5.8$  Hz), 8.46-8.41 (m, 2H), 8.08 (dd, 1H,  $^3J=5.8$  Hz,  $^4J=0.7$  Hz), 7.69-7.66 (m, 3H);  $^{13}\text{C}$  NMR (100 MHz,  $\text{DMSO}-d_6$ ):  $\delta$  156.0 (C), 154.6 (CH), 148.6 (CH), 146.8 (CH), 144.9 (C), 137.1 (C), 136.2 (C), 132.4 (CH), 130.1 (2CH), 129.2 (2CH), 122.5 (CH); IR (ATR): 3057, 3032, 1593, 1545, 1440, 1400, 1315, 1232, 959  $\text{cm}^{-1}$ ; MS (ESI)  $m/z$  (%) = 208.2 (100)  $[\text{M}+\text{H}]^+$ . Anal. calcd for  $\text{C}_{13}\text{H}_9\text{N}_3$ : C 75.35, H 4.38, N 20.28. Found: C 75.41, H 4.39, N 20.21.

2-(4-Methoxyphenyl)pyrido[3,4-b]pyrazine (**11b**)

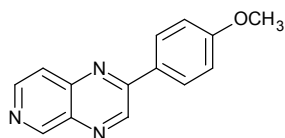

Compound **11b** was obtained following the procedure used for 2-phenylpyrido[3,4-b]pyrazine **11a**. The crude product was purified by silica gel column chromatography using dichloromethane/ethanol (19/1) as eluent to give compound **11b** as a white powder (9.61 g, 89%).  $R_f$  0.61 ( $\text{CH}_2\text{Cl}_2/\text{EtOH}$  19:1); Mp 143-144 °C (lit. [30]:

140-142 °C);  $^1\text{H NMR}$  (400 MHz,  $\text{DMSO-}d_6$ ):  $\delta$  9.72 (s, 1H), 9.46 (d, 1H,  $^4J=0.6$  Hz), 8.83 (dd, 1H,  $^3J=5.5$  Hz,  $^4J=0.7$  Hz), 8.41 (d, 2H,  $^3J=8.9$  Hz), 8.00 (dd, 1H,  $^3J=5.5$  Hz,  $^4J=0.7$  Hz), 7.18 (d, 2H,  $^3J=8.9$  Hz), 3.91 (s, 3H);  $^{13}\text{C NMR}$  (100 MHz,  $\text{DMSO-}d_6$ ):  $\delta$  163.0 (C), 155.6 (C), 154.4 (CH), 148.6 (CH), 146.5 (CH), 145.1 (C), 136.8 (C), 130.8 (2CH), 128.5 (C), 122.3 (CH), 115.7 (2CH), 56.4 ( $\text{CH}_3$ ); IR (ATR): 3044, 3021, 1593, 1537, 1514, 1448, 1277, 1254, 1229, 1177, 1020, 959  $\text{cm}^{-1}$ ; MS (ESI)  $m/z$  (%) = 238.1 (100)  $[\text{M}+\text{H}]^+$ . Anal. calcd for  $\text{C}_{14}\text{H}_{11}\text{N}_3\text{O}$ : C 70.87, H 4.67, N 17.71. Found: C 70.82, H 4.65, N 17.78.

#### 2-Phenylpyrido[3,4-*b*]pyrazine-6-oxide (crude)

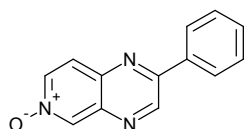

A solution of 2-phenylpyrido[3,4-*b*]pyrazine **11a** (500 mg, 2.4 mmol) and *m*CPBA (416 mg, 2.4 mmol) in  $\text{CH}_2\text{Cl}_2$  (20 mL) was refluxed for 6h. Dichloromethane was added and the organic layer was washed with a saturated aqueous solution of sodium carbonate and brine, then dried over sodium sulfate and filtered. The solvent was removed under reduced pressure to give the crude 2-phenylpyrido[3,4-*b*]pyrazine-6-oxide as a yellow powder (420 mg, 78%).  $R_f$  0.51 ( $\text{CH}_2\text{Cl}_2/\text{EtOH}$  19:1); Mp 173-175 °C;  $^1\text{H NMR}$  (400 MHz,  $\text{DMSO-}d_6$ ):  $\delta$  9.70 (s, 1H), 9.09 (d, 1H,  $^4J=1.8$  Hz), 8.51 (dd, 1H,  $^3J=7.5$  Hz,  $^4J=1.8$  Hz), 8.40-8.36 (m, 2H), 8.13 (d, 1H,  $^3J=7.4$  Hz), 7.67-7.64 (m, 3H); MS (ESI)  $m/z$  (%) = 224.1 (100)  $[\text{M}+\text{H}]^+$ .

#### 2-(4-Methoxyphenyl)pyrido[3,4-*b*]pyrazine-6-oxide (crude)

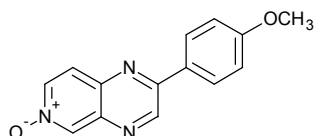

The *N*-oxide was obtained following the procedure used for 2-phenylpyrido[3,4-*b*]pyrazine-6-oxide to give the crude 2-(4-methoxyphenyl)pyrido[3,4-*b*]pyrazine-6-oxide as a yellow powder (395 mg, 65%).  $R_f$  0.48 ( $\text{CH}_2\text{Cl}_2/\text{EtOH}$  19:1); Mp 186-177 °C;  $^1\text{H NMR}$  (400 MHz,  $\text{DMSO-}d_6$ ):  $\delta$  9.67 (s, 1H), 9.04 (d, 1H,  $^4J=0.8$  Hz), 8.47 (d, 1H,  $^3J=5.2$  Hz), 8.37 (d, 2H,  $^3J=8.8$  Hz), 8.13 (d, 1H,  $^3J=5.8$  Hz), 7.20 (d, 2H,  $^3J=8.8$  Hz), 3.92 (s, 3H); MS (ESI)  $m/z$  (%) = 254.2 (100)  $[\text{M}+\text{H}]^+$ .

#### 5-Chloro-2-phenylpyrido[3,4-*b*]pyrazine (**12a**)

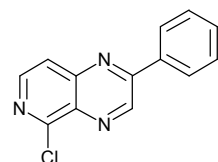

A solution of crude 2-phenylpyrido[3,4-*b*]pyrazine-6-oxide (270 mg, 1.2 mmol) and phosphorus oxychloride (114  $\mu\text{L}$ , 1.2 mmol) in dichloromethane (10 mL) was refluxed for 8 h. Dichloromethane was added and an aqueous saturated solution of sodium hydrogenocarbonate (30 mL) was added carefully after cooling with ice bath. The aqueous layer was extracted with dichloromethane, the organic layer was dried over  $\text{Na}_2\text{SO}_4$ , filtered and then the solvent was removed under reduce pressure. The crude product was purified by silica gel column chromatography using dichloromethane as eluent to give compound **12a** as a beige powder (160 mg, 55%).  $R_f$  0.48 ( $\text{CH}_2\text{Cl}_2/\text{EtOH}$  19:1); Mp 187-189 °C (lit. [22]: 189-190 °C);  $^1\text{HNMR}$  (400 MHz,  $\text{DMSO-}d_6$ ):  $\delta$  9.85 (s, 1H), 8.68 (d, 1H,  $^3J=5.8$  Hz), 8.47-8.43 (m, 2H), 8.11 (d, 1H,  $^3J=5.8$

Hz), 7.72-7.69 (m, 3H), 6.30 (br s, 2H);  $^{13}\text{C}$  NMR (100 MHz, DMSO- $d_6$ ):  $\delta$  156.1 (C), 154.3 (CH), 149.2 (C), 147.3 (CH), 146.1 (C), 136.1 (C), 135.4 (C), 133.1 (CH), 130.6 (2CH), 129.3 (2CH), 122.5 (2CH); IR (ATR): 3030, 1697, 1620, 1537, 1400, 1313, 1244, 1211, 1120, 939  $\text{cm}^{-1}$ ; MS (ESI)  $m/z$  (%) = 242.1 (100)  $[\text{M}+\text{H}]^+$ , 244.1 (40)  $[\text{M}+\text{H}+2]^+$ . Anal. calcd for  $\text{C}_{13}\text{H}_8\text{ClN}_3$ : C 64.61, H 3.34, N 17.39. Found: C 64.64, H 3.33, N 17.37.

#### 5-Chloro-2-(4-methoxyphenyl)pyrido[3,4-*b*]pyrazine (**12b**)

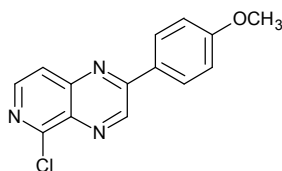

Compound **12b** was obtained following the procedure used for 5-chloro-2-phenylpyrido[3,4-*b*]pyrazine **12a**. The crude product was purified by silica gel column chromatography using dichloromethane as eluent to give compound **12b** as a white powder (180 mg, 55%).  $R_f$  0.68 ( $\text{CH}_2\text{Cl}_2/\text{EtOH}$  19:1); Mp 193-195  $^\circ\text{C}$ ;  $^1\text{H}$  NMR (400 MHz, DMSO- $d_6$ ):  $\delta$  9.80 (s, 1H), 8.63 (d, 1H,  $^3J=5.8$  Hz), 8.44 (d, 2H,  $^3J=8.5$  Hz), 8.03 (d, 1H,  $^3J=6.0$  Hz), 7.23 (d, 2H,  $^3J=8.8$  Hz), 3.92 (s, 3H);  $^{13}\text{C}$  NMR (100 MHz, DMSO- $d_6$ ):  $\delta$  162.7 (C), 152.6 (C), 147.4 (CH), 142.7 (CH), 139.2 (C), 138.9 (C), 137.2 (C), 130.2 (2CH), 128.5 (C), 125.9 (CH), 115.7 (2CH), 56.4 ( $\text{CH}_3$ ); IR (ATR): 3010, 2922, 1595, 1564, 1516, 1294, 1278, 1252, 1186, 1029, 960  $\text{cm}^{-1}$ ; MS (ESI)  $m/z$  (%) = 272.1 (100)  $[\text{M}+\text{H}]^+$ , 274.1 (40)  $[\text{M}+\text{H}+2]^+$ . Anal. calcd for  $\text{C}_{14}\text{H}_{10}\text{ClN}_3\text{O}$ : C 61.89, H 3.71, N, 15.47. Found: C 61.93, H 3.73, N 17.41.

#### Synthesis of 7-chloro-2-phenylpyrido[3,4-*b*]pyrazine (**16**)

#### and 7-chloro-3-phenylpyrido[3,4-*b*]pyrazine (**17**)

Compounds **16** and **17** were synthesized by reaction of 2,3-diamino-6-chloropyridine **15** and phenylglyoxal monohydrate following the procedure used for **11a-b**. The crude mixture of products was purified by silica gel column chromatography using dichloromethane as eluent to give compound **16** as a white powder (4.92 g, 44%) and compound **17** as a white powder (1.51 g, 14%).

#### 7-chloro-2-phenylpyrido[3,4-*b*]pyrazine (**16**)

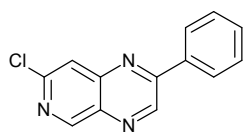

$R_f$  0.32 ( $\text{CH}_2\text{Cl}_2$ ); Mp 146-148  $^\circ\text{C}$ ;  $^1\text{H}$  NMR (400 MHz, DMSO- $d_6$ ):  $\delta$  9.81 (s, 1H), 9.43 (s, 1H), 8.46-8.42 (m, 2H), 8.27 (s, 1H), 7.71-7.68 (m, 3H);  $^{13}\text{C}$  NMR (100 MHz, DMSO- $d_6$ ):  $\delta$  156.7 (C), 154.8 (CH), 149.5 (C), 147.4 (CH), 146.7 (C), 136.4 (C), 135.8 (C), 132.8 (CH), 130.2 (2CH), 129.2 (2CH), 122.0 (2CH); IR (ATR): 3061, 3035, 1579, 1562, 1541, 1444, 1423, 1387, 1309, 1263, 1072, 1022, 956  $\text{cm}^{-1}$ ; MS (ESI)  $m/z$  (%) = 242.1 (100)  $[\text{M}+\text{H}]^+$ , 244.1(39)  $[\text{M}+\text{H}+2]^+$ . Anal. calcd for  $\text{C}_{13}\text{H}_8\text{ClN}_3$ : C 64.61, H 3.34, N 17.39. Found: C 64.64, H 3.36, N 17.34.

#### 7-Chloro-3-phenylpyrido[3,4-*b*]pyrazine (**17**)

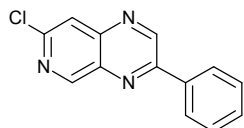

$R_f$  0.57 ( $\text{CH}_2\text{Cl}_2$ ); Mp 157-159 °C;  $^1\text{H}$  NMR (400 MHz,  $\text{DMSO-}d_6$ ):  $\delta$  9.90 (s, 1H), 9.47 (s, 1H), 8.45-8.40 (m, 2H), 8.29 (s, 1H), 7.69-7.66 (m, 3H);  $^{13}\text{C}$  NMR (100 MHz,  $\text{DMSO-}d_6$ ):  $\delta$  155.2 (CH), 154.0 (C), 150.5 (CH), 148.6 (C), 145.9 (C), 136.8 (C), 136.0 (C), 132.2 (CH), 130.2 (2CH), 128.7 (2CH), 121.9 (CH); IR (ATR): 3060, 3041, 1580, 1537, 1462, 1425, 1367, 1303, 1278, 1058, 1024, 952  $\text{cm}^{-1}$ ; MS (ESI)  $m/z$  (%) = 242.1 (100)  $[\text{M}+\text{H}]^+$ , 244.1 (37)  $[\text{M}+\text{H}+2]^+$ . Anal. calcd for  $\text{C}_{13}\text{H}_8\text{ClN}_3$ : C 64.61, H 3.34, N 17.39. Found: C 64.62, H 3.36, N 17.36.

## Synthesis of aminopyrido[3,4-*b*]pyrazine intermediates 8 and 13

### Synthesis of 8-amino-3-phenylpyrido[3,4-*b*]pyrazine (8)

#### *N*-[3-Phenylpyrido[3,4-*b*]pyrazin-8-yl]benzophenone imine (7)

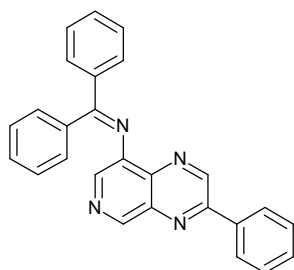

To a solution of 8-bromo-3-phenylpyrido[3,4-*b*]pyrazine **6** (1.90 g, 6.6 mmol) in toluene (80 mL) under argon was added successively benzophenone imine (1.33 mL, 8.0 mmol), tris(dibenzylideneacetone) palladium (20 mg,  $5.10^{-5}$  mol), 2,2'-bis(diphenylphosphino)-1,1'-binaphthyl (8 mg,  $1.7.10^{-5}$  mol) and sodium *tert*-butoxide (892 mg, 9.2 mmol). The reaction mixture was heated at 110 °C for 12 h and was cooled to room temperature. Ethyl acetate (120 mL) was added. The reaction mixture was washed with brine and water. The organic layer was dried over sodium sulfate, filtrated and the solvents were removed under reduced pressure. The crude product was purified by silica gel column chromatography using dichloromethane/ethanol mixtures (from 10:0 to 19:1) as eluent to give compound **7** as a beige powder (1.83 g, 72%).  $R_f$  0.64 ( $\text{CH}_2\text{Cl}_2/\text{EtOH}$  19:1); Mp 181-182 °C;  $^1\text{H}$  NMR (400 MHz,  $\text{DMSO-}d_6$ ):  $\delta$  9.77 (s, 1H), 9.13 (s, 1H), 8.40-8.36 (m, 2H), 8.20 (s, 1H), 7.81-7.58 (m, 8H), 7.25-7.20 (m, 5H);  $^{13}\text{C}$  NMR (100 MHz,  $\text{DMSO-}d_6$ ):  $\delta$  171.8 (C), 153.4 (C), 149.0 (CH), 148.2 (CH), 144.0 (C), 138.8 (C), 137.9 (C), 137.2 (C), 136.9 (C), 136.7 (CH), 136.2 (C), 133.6 (CH), 132.6 (CH), 132.0 (CH), 130.5 (CH), 130.2 (2CH), 130.1 (CH), 129.9 (CH), 129.5 (2CH), 129.0 (CH), 128.6 (CH); IR (ATR): 3061, 3028, 1624, 1537, 1446, 1313, 1276, 1259, 1180, 875  $\text{cm}^{-1}$ ; MS (ESI)  $m/z$  (%) = 387.2 (100)  $[\text{M}+\text{H}]^+$ . Anal. calcd for  $\text{C}_{26}\text{H}_{18}\text{N}_4$ : C 80.81, H 4.69, N 14.50. Found: C 80.89, H 4.66, N 14.45.

#### 8-Amino-3-phenylpyrido[3,4-*b*]pyrazine (8)

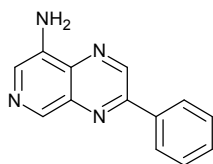

To a solution of *N*-[3-phenylpyrido[3,4-*b*]pyrazin-8-yl]benzophenone imine **7** (900 mg, 2.4 mmol) in methanol (30 mL) was added sodium acetate (510 mg, 3.24 mmol) and hydroxylamine hydrochloride (324 mg, 4.8 mmol). The reaction mixture was stirred at 75 °C for 48 h and cooled to room temperature. The solution was poured into a 1M aqueous solution of sodium hydroxide and extracted with dichloromethane. The organic layer was dried over sodium sulfate, filtrated and the solvent was removed

under reduced pressure. The crude product was purified by silica gel column chromatography using dichloromethane/ethanol mixtures (from 10:0 to 19:1) as eluent to give compound **8** as a brown powder (279 mg, 69%).  $R_f$  0.51 (CH<sub>2</sub>Cl<sub>2</sub>/EtOH 19:1); Mp 201-202 °C; <sup>1</sup>H NMR (400 MHz, DMSO-*d*<sub>6</sub>): δ 9.62 (s, 1H), 8.69 (s, 1H), 8.41-8.36 (m, 2H), 8.20 (s, 1H), 7.67-7.64 (m, 3H), 6.30 (br s, 2H); <sup>13</sup>C NMR (100 MHz, DMSO-*d*<sub>6</sub>): δ 153.4 (C), 145.3 (CH), 141.3 (C), 139.5 (CH), 137.5 (C), 136.6 (C), 133.3 (C), 131.6 (CH), 130.1 (2CH), 128.5 (2CH); IR (ATR): 3442, 3248, 3101, 1610, 1556, 1508, 1448, 1369, 1269, 1184, 937 cm<sup>-1</sup>; MS (ESI)  $m/z$  (%) = 223.1 (100) [M+H]<sup>+</sup>. Anal. calcd for C<sub>13</sub>H<sub>10</sub>N<sub>4</sub>: C 70.26, H 4.54, N 25.21. Found: C 70.13, H 4.52, N 25.36.

### Synthesis of 5-amino-2-phenylpyrido[3,4-*b*]pyrazine (**13**)

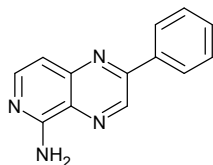

In a sealed tube, a solution of 5-chloro-2-phenylpyrido[3,4-*b*]pyrazine **12a** (500 mg, 2.2 mmol) in a mixture of ammonium hydroxide and 1,4-dioxane (10 mL/10 mL) was heated at 120 °C for 24 h. The dioxane was then removed under reduced pressure, and the resulting mixture was poured in water. The precipitate was filtered and recrystallized from methanol to give compound **13** as a yellow powder (420 mg, 91%).  $R_f$  0.57 (CH<sub>2</sub>Cl<sub>2</sub>/EtOH 19:1); Mp 191-193 °C; <sup>1</sup>H NMR (400 MHz, DMSO-*d*<sub>6</sub>): δ 9.44 (s, 1H), 8.37-8.34 (m, 2H), 8.13 (d, 1H, <sup>3</sup>J=5.8 Hz), 7.66-7.63 (m, 3H), 7.29 (br s, 2H), 7.08 (d, 1H, <sup>3</sup>J=6.0 Hz); <sup>13</sup>C NMR (100 MHz, DMSO-*d*<sub>6</sub>): δ 159.1 (C), 155.8 (C), 147.1 (C), 146.8 (CH), 142.3 (CH), 136.5 (C), 131.9 (CH), 130.1 (2CH), 128.7 (2CH), 127.6 (C), 110.4 (CH); IR (ATR): 3311, 3196, 3059, 3039, 1641, 1543, 1485, 1440, 1303, 1274, 1186, 153, 939 cm<sup>-1</sup>; MS (ESI)  $m/z$  (%) = 223.2 (100) [M+H]<sup>+</sup>. Anal. calcd for C<sub>13</sub>H<sub>10</sub>N<sub>4</sub>: C 70.26, H 4.54, N 25.21. Found: C 70.23, H 4.55, N 25.23.

### General procedure for the synthesis of *N*-aryl-*N'*-(phenylpyrido[3,4-*b*]pyrazinyl)ureas **9a**, **9b** and **14a**

#### *N*-(3-Methoxyphenyl)-*N'*-(3-phenylpyrido[3,4-*b*]pyrazin-8-yl)urea (**9a**)

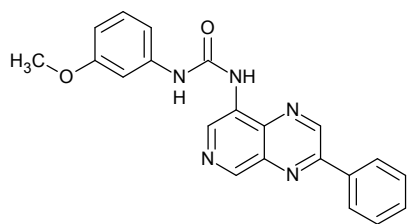

To a solution of 8-amino-3-phenylpyrido[3,4-*b*]pyrazine **8** (200 mg, 0.9 mmol) in *N,N*-dimethylformamide (10 mL) was added portionwise sodium hydride at 60% in mineral oil (43 mg, 1.1 mmol). The reaction mixture was stirred at room temperature for 30 minutes and 3-methoxyphenylisocyanate (118 μL, 0.9 mmol) was added. The reaction mixture was stirred for 3 h at room temperature and then quenched with water. The aqueous layer was extracted with dichloromethane, the combined organic extracts were dried over sodium sulfate, filtrated and the solvent was removed under reduced pressure. The crude product was purified by silica gel column chromatography using dichloromethane/ethanol mixtures (from 10:0 to 19:1) as eluent to give compound **9a** as a beige powder (200 mg, 60%);  $R_f$  0.54 (CH<sub>2</sub>Cl<sub>2</sub>/EtOH 19:1); Mp 260-261 °C; <sup>1</sup>H NMR (400 MHz, DMSO-*d*<sub>6</sub>): δ 9.94 (br s, 1H), 9.81 (s, 1H), 9.68 (s, 1H), 9.60 (br s, 1H), 9.19 (s, 1H), 8.45-8.43 (m, 2H), 7.69-7.68 (m, 3H), 7.29-6.64 (m, 4H), 3.80 (s, 3H); <sup>13</sup>C NMR (100 MHz, DMSO-

$d_6$ ):  $\delta$  160.7 (C), 156.9 (C), 152.1 (C), 151.6 (C), 146.3 (C), 145.3 (CH), 144.5 (CH), 140.5 (C), 136.0 (C), 132.5 (CH), 130.7 (CH), 130.2 (2CH), 129.0 (2CH), 127.3 (C), 116.3 (CH), 112.7 (CH), 109.6 (CH), 106.2 (CH), 56.1 (CH<sub>3</sub>); IR (ATR): 3240, 3153, 3078, 2935, 1697, 1597, 1564, 1485, 1300, 1250, 1163, 1047 cm<sup>-1</sup>; MS (ESI)  $m/z$  (%) = 372.3 (100) [M+H]<sup>+</sup>. Anal. calcd for C<sub>21</sub>H<sub>17</sub>N<sub>5</sub>O<sub>2</sub>: C 67.91, H 4.61, N 8.62. Found: C 67.84, H 4.63, N 8.67.

***N*-(4-Methoxyphenyl)-*N'*-(3-phenylpyrido[3,4-*b*]pyrazin-8-yl)urea (9b)**

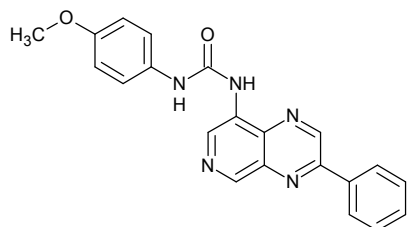

Compound **9b** was obtained following the representative procedure, using 8-amino-3-phenylpyrido[3,4-*b*]pyrazine **8** (200 mg, 0.9 mmol) and 4-methoxyphenylisocyanate (117  $\mu$ L, 0.9 mmol), as a yellow powder (257 mg, 77%);  $R_f$  0.52 (CH<sub>2</sub>Cl<sub>2</sub>/EtOH 19:1); Mp 270-271 °C. <sup>1</sup>H NMR (400 MHz, DMSO-*d*<sub>6</sub>):  $\delta$  9.78 (br s, 1H), 9.67 (s, 1H), 9.53-9.52 (m, 2H), 9.15 (s, 1H), 8.48-8.45 (m, 2H), 7.68-7.67 (m, 3H), 7.52-6.91 (m, 4H), 3.77 (s, 3H); <sup>13</sup>C NMR (100 MHz, DMSO-*d*<sub>6</sub>):  $\delta$  154.9 (C), 153.2 (C), 152.3 (C), 146.2 (CH), 145.2 (CH), 136.2 (C), 135.6 (C), 133.8 (C), 133.5 (CH), 132.6 (C), 131.8 (C), 131.2 (CH), 129.4 (2CH), 128.0 (2CH), 120.2 (2CH), 114.3 (2CH), 55.4 (CH<sub>3</sub>); IR (ATR): 3315, 3240, 1703, 1522, 1508, 1415, 1296, 1238, 1197, 1174, 1021, 825 cm<sup>-1</sup>; MS (ESI)  $m/z$  (%) = 372.1 (100) [M+H]<sup>+</sup>. Anal. calcd for C<sub>21</sub>H<sub>17</sub>N<sub>5</sub>O<sub>2</sub>: C 67.91, H 4.61, N 8.62. Found: C 67.93, H 4.62, N 8.59.

***N*-(3-Methoxyphenyl)-*N'*-(2-phenylpyrido[3,4-*b*]pyrazin-5-yl)urea (14a)**

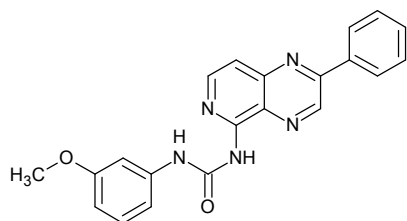

Compound **14a** was obtained following the representative procedure, using 5-amino-2-phenylpyrido[3,4-*b*]pyrazine **13** (200 mg, 0.9 mmol) and 3-methoxyphenylisocyanate (118  $\mu$ L, 0.9 mmol), as a yellow powder (180 mg, 54%);  $R_f$  0.66 (CH<sub>2</sub>Cl<sub>2</sub>/EtOH 19:1); Mp 205-207 °C. <sup>1</sup>H NMR (400 MHz, DMSO-*d*<sub>6</sub>):  $\delta$  11.93 (br s, 1H), 9.71 (s, 1H), 9.34 (br s, 1H), 8.57 (d, 1H, <sup>3</sup>J=6.0 Hz), 8.45-8.43 (m, 2H), 7.70-7.67 (m, 4H), 7.42 (t, 1H, <sup>4</sup>J=2.0 Hz), 7.32 (t, 1H, <sup>3</sup>J=8.1 Hz), 7.21 (d, 1H, <sup>3</sup>J=8.1 Hz), 6.73 (dd, 1H, <sup>3</sup>J=8.1 Hz, <sup>4</sup>J=2.1 Hz), 3.82 (s, 3H); <sup>13</sup>C NMR (100 MHz, DMSO-*d*<sub>6</sub>):  $\delta$  160.7 (C), 156.9 (C), 152.1 (C), 151.6 (C), 146.4 (C), 145.3 (CH), 144.5 (CH), 140.5 (C), 136.0 (C), 132.5 (CH), 130.7 (CH), 130.2 (2CH), 129.0 (2CH), 127.4 (C), 116.3 (CH), 112.7 (CH), 109.6 (CH), 106.3 (CH), 56.0 (CH<sub>3</sub>); IR (ATR): 3581, 3431, 3055, 2924, 1703, 1598, 1517, 1495, 1381, 1313, 1255, 1226, 1114, 1078, 931 cm<sup>-1</sup>; MS (ESI)  $m/z$  (%) = 372.2 (100) [M+H]<sup>+</sup>. Anal. calcd for C<sub>21</sub>H<sub>17</sub>N<sub>5</sub>O<sub>2</sub>: C 67.91, H 4.61, N 8.62. Found: C 67.88, H 4.60, N 8.90.

**General procedure for the synthesis of *N*-alkyl-*N'*-(phenylpyrido[3,4-*b*]pyrazinyl)ureas **9c** and **14b****

***N*-Allyl-*N'*-(3-phenylpyrido[3,4-*b*]pyrazin-8-yl)urea (9c)**



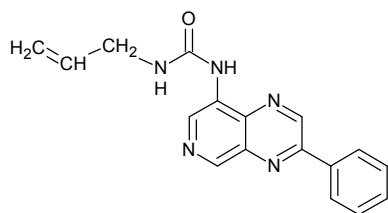

To a solution of 8-amino-3-phenylpyrido[3,4-*b*]pyrazine **8** (200 mg, 0.9 mmol) in pyridine (8 mL) was added allylisocyanate (79  $\mu$ L, 0.9 mmol) and the reaction mixture was heated at reflux overnight. Pyridine was removed under reduced pressure and the crude product was purified by silica gel column chromatography using dichloromethane/ethanol mixtures (from 10:0 to 19:1) as eluent to give compound **9c** as a yellow powder (143 mg, 52%);  $R_f$  0.53 ( $\text{CH}_2\text{Cl}_2/\text{EtOH}$  19:1); Mp 232-233  $^\circ\text{C}$ ;  $^1\text{H}$  NMR (400 MHz,  $\text{DMSO-}d_6$ ):  $\delta$  9.74 (br s, 1H), 9.60 (s, 1H), 9.40 (s, 1H), 9.11 (br s, 1H), 8.41-8.38 (m, 2H), 7.67-7.65 (m, 4H), 5.93-5.87 (m, 1H), 5.28-5.15 (m, 2H), 3.84-3.82 (m, 2H);  $^{13}\text{C}$  NMR (100 MHz,  $\text{DMSO-}d_6$ ):  $\delta$  154.7 (C), 153.1 (C), 146.1 (CH), 144.7 (CH), 136.2 (C), 136.0 (CH), 135.6 (C), 133.7 (C), 133.2 (CH), 132.3 (C), 131.2 (CH), 129.4 (2CH), 128.0 (2CH), 115.2 ( $\text{CH}_2$ ), 41.7 ( $\text{CH}_2$ ); IR (ATR): 3312, 3286, 1655, 1555, 1517, 1259, 12461020, 921  $\text{cm}^{-1}$ ; MS (ESI)  $m/z$  (%) = 306.1 (100)  $[\text{M}+\text{H}]^+$ . Anal. calcd for  $\text{C}_{17}\text{H}_{15}\text{N}_5\text{O}$ : C 66.87, H 4.95, N 5.24. Found: C 66.84, H 4.96, N 5.26.

#### ***N*-Ethyl-*N'*-(2-phenylpyrido[3,4-*b*]pyrazin-5-yl)urea (**14b**)**

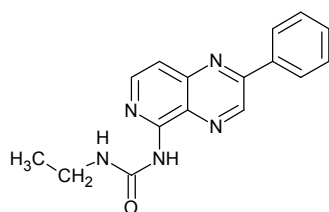

Compound **14b** was obtained following the representative procedure, using 5-amino-2-phenylpyrido[3,4-*b*]pyrazine **13** (200 mg, 0.9 mmol) and ethylisocyanate (71  $\mu$ L, 0.9 mmol), as a beige powder (161 mg, 61%);  $R_f$  0.61 ( $\text{CH}_2\text{Cl}_2/\text{EtOH}$  19:1); Mp 165-166  $^\circ\text{C}$ ;  $^1\text{H}$  NMR (400 MHz,  $\text{DMSO-}d_6$ ):  $\delta$  9.67 (s, 1H), 9.48 (t, 1H,  $^3J=4.5$  Hz), 8.91 (br s, 1H), 8.44-8.41 (m, 3H), 7.69-7.66 (m, 3H), 7.59 (d, 1H,  $^3J=6.4$  Hz), 3.37 (m, 2H), 1.23 (t, 3H,  $^3J=7.0$  Hz);  $^{13}\text{C}$  NMR (100 MHz,  $\text{DMSO-}d_6$ ):  $\delta$  156.7 (C), 154.0 (C), 152.3 (C), 146.2 (C), 145.4 (CH), 144.4 (CH), 136.0 (C), 132.4 (CH), 130.2 (2CH), 128.9 (2CH), 127.0 (C), 115.6 (CH), 35.2 ( $\text{CH}_2$ ), 16.2 ( $\text{CH}_3$ ); IR (ATR): 3398, 3233, 3059, 2968, 1710, 1552, 1487, 1450, 1298, 1248, 1174, 1072, 937  $\text{cm}^{-1}$ ; MS (ESI)  $m/z$  (%) = 294.2 (100)  $[\text{M}+\text{H}]^+$ . Anal. calcd for  $\text{C}_{16}\text{H}_{15}\text{N}_5\text{O}$ : C 65.52, H 5.15, N 23.88. Found: C 65.50, H 5.16, N 23.90.

**General procedure for the synthesis of *N*-aryl-phenylpyrido[3,4-*b*]pyrazinamines **9d-g**, **14c-j**, **18a-c** and **19****

#### ***N*-(3-Chloro-4-fluorophenyl)-3-phenylpyrido[3,4-*b*]pyrazin-8-amine (**9d**)**

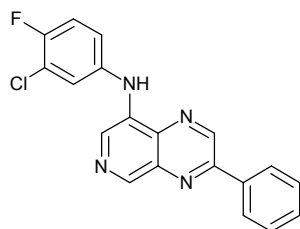

To a solution of 8-bromo-3-phenylpyrido[3,4-*b*]pyrazine **6a** (150mg, 0.5 mmol) in toluene (8 mL) under argon was added successively 3-chloro-4-fluoroaniline (87 mg, 0.6 mmol), Pd<sub>2</sub>(dba)<sub>3</sub> (2 mg, 3.9·10<sup>-6</sup> mol), BINAP (1 mg, 1.3·10<sup>-6</sup> mol) and *t*-BuONa (71 mg, 0.7 mmol). The resulting mixture was stirred at 100 °C for 4 h and then allowed to cool to room temperature. Ethyl acetate (15 mL) was added, the combined organic layers were washed with water (3 × 15 mL), dried over sodium sulfate, filtrated and the solvent was removed under reduced pressure. The crude product was purified by silica gel column chromatography using dichloromethane/ethanol mixtures (from 10:0 to 19:1) as eluent to give compound **9d** as an orange powder (86 mg, 49%); *R*<sub>f</sub> 0.66 (CH<sub>2</sub>Cl<sub>2</sub>/EtOH 19:1); Mp 232-234 °C; <sup>1</sup>H NMR (400 MHz, DMSO-*d*<sub>6</sub>): δ 9.78 (s, 1H), 9.08 (br s, 1H), 9.04 (s, 1H), 8.63 (s, 1H), 8.46-8.42 (m, 2H), 7.70-7.66 (m, 4H), 7.47-7.42 (m, 2H); <sup>13</sup>C NMR (100 MHz, DMSO-*d*<sub>6</sub>): δ 153.9 (C), 146.5 (CH), 143.9 (C), 142.2 (CH), 139.9 (CH), 137.7 (C), 136.5 (C), 136.3 (C), 135.4 (C), 132.0 (CH), 130.2 (2CH), 128.7 (2CH), 122.7 (CH), 121.2 (C), 120.7 (C), 118.3 (CH), 118.1 (CH); IR (ATR): 3186, 3070, 3047, 1591, 1566, 1525, 1493, 1373, 1313, 1261, 1221, 1053, 947cm<sup>-1</sup>; MS (ESI) *m/z* (%) = 351.1 (100) [M+H]<sup>+</sup>, 353.1 (38) [M+H+2]<sup>+</sup>. Anal. calcd for C<sub>19</sub>H<sub>12</sub>ClFN<sub>4</sub>: C 65.06, H 3.45, N 15.97. Found: C 64.99, H 3.44, N 16.05.

### 3-Phenyl-N-(4-piperidin-1-ylphenyl)pyrido[3,4-*b*]pyrazin-8-amine (**9e**)

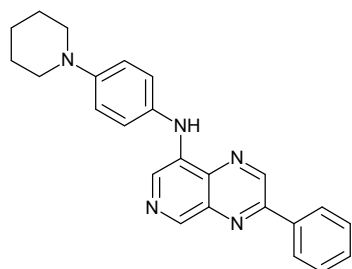

Compound **9e** was obtained following the representative procedure, using 8-bromo-3-phenylpyrido[3,4-*b*]pyrazine **6a** (150 mg, 0.5 mmol) and 4-(piperidin-1-yl)aniline (106 mg, 0.6 mmol), as a beige powder (114 mg, 60%); *R*<sub>f</sub> 0.58 (CH<sub>2</sub>Cl<sub>2</sub>/EtOH 19:1); Mp 242-244 °C; <sup>1</sup>H NMR (400 MHz, DMSO-*d*<sub>6</sub>): δ 9.62 (s, 1H), 8.74 (s, 1H), 8.64 (s, 1H), 8.51 (s, 1H), 8.19 (d, 2H, <sup>3</sup>J=8.7 Hz), 7.30-7.28 (m, 1H), 7.22-7.09 (m, 4H), 6.95 (d, 2H, <sup>3</sup>J=8.7 Hz), 3.13-3.12 (m, 4H), 1.69-1.67 (m, 4H), 1.54-1.52 (m, 2H); <sup>13</sup>C NMR (100 MHz, DMSO-*d*<sub>6</sub>): δ 160.9 (C), 153.2 (C), 143.9 (C), 142.6 (2CH), 133.2 (C), 131.7 (C), 130.1 (2CH), 128.9 (2CH), 128.5 (C), 124.1 (C), 116.2 (CH), 115.0 (2CH), 112.3 (CH), 107.9 (CH), 105.1 (CH), 49.2 (2CH<sub>2</sub>), 25.4 (2CH<sub>2</sub>), 24.1 (CH<sub>2</sub>); IR (ATR): 3254, 3032, 2927, 2867, 1608, 1564, 1505, 1335, 1221, 1202, 1012, 956 cm<sup>-1</sup>; MS (ESI) *m/z* (%) = 382.3 (100) [M+H]<sup>+</sup>. Anal. calcd for C<sub>24</sub>H<sub>23</sub>N<sub>5</sub>: C 75.56, H 6.08, N 18.36. Found: C 75.60, H 6.11, N 18.44.

### N-Phenyl-3-(4-piperidin-1-ylphenyl)pyrido[3,4-*b*]pyrazin-8-amine (**9f**)

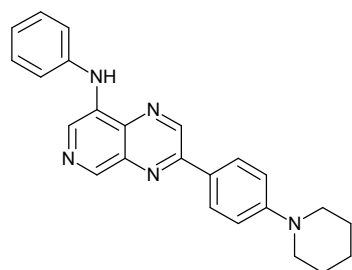

Compound **9f** was obtained following the representative procedure, using 8-bromo-3-(4-piperidin-1-ylphenyl)pyrido[3,4-*b*]pyrazine **6b** (185 mg, 0.5 mmol) and aniline (55 μL, 0.6 mmol), as a yellow powder (101 mg, 53%); *R*<sub>f</sub> 0.55 (CH<sub>2</sub>Cl<sub>2</sub>/EtOH 19:1); Mp 250-252 °C; <sup>1</sup>H NMR (400 MHz, DMSO-*d*<sub>6</sub>): δ 9.61 (s, 1H), 8.72 (s, 1H), 8.62 (s, 1H), 8.56 (br s, 1H), 8.25 (d, 2H, <sup>3</sup>J=9.1 Hz), 7.29 (m, 1H), 7.24-7.02 (m, 5H), 6.70-6.68

(m, 1H), 3.40-3.43 and 1.65-1.63 (m, 10H);  $^{13}\text{C}$  NMR (100 MHz, DMSO- $d_6$ ):  $\delta$  161.3 (C), 153.1 (C), 144.2 (C), 143.8 (2CH), 134.1 (C), 132.7 (C), 130.5 (2CH), 129.9 (2CH), 129.7 (C), 123.9 (C), 115.1 (2CH), 115.9 (CH), 112.1 (CH), 108.4 (CH), 106.7 (CH), 49.4 (2CH $_2$ ), 25.9 (2CH $_2$ ), 24.7 (CH $_2$ ); IR (ATR): 3261, 3039, 2922, 2848, 1604, 1587, 1564, 1516, 1357, 1238, 1209, 1024, 916  $\text{cm}^{-1}$ ; MS (ESI)  $m/z$  (%) = 382.1 (100)  $[\text{M}+\text{H}]^+$ . Anal. calcd for  $\text{C}_{24}\text{H}_{23}\text{N}_5$ : C 75.56, H 6.08, N 18.36. Found: C 75.53, H 6.10, N 18.42.

***N*-(3-Methoxyphenyl)-3-(4-piperidin-1-ylphenyl)pyrido[3,4-*b*]pyrazin-8-amine (9g)**

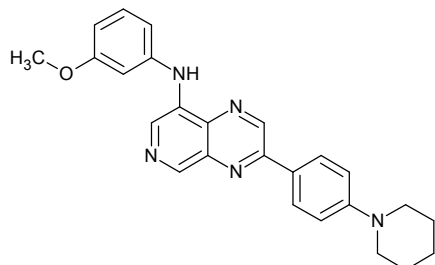

Compound **9g** was obtained following the representative procedure, using 8-bromo-3-(4-piperidin-1-ylphenyl)pyrido[3,4-*b*]pyrazine **6b** (185 mg, 0.5 mmol) and 3-methoxyaniline (74 mg, 0.6 mmol), as a yellow powder (128 mg, 62%);  $R_f$  0.60 ( $\text{CH}_2\text{Cl}_2/\text{EtOH}$  19:1); Mp 223-225  $^\circ\text{C}$ ;  $^1\text{H}$  NMR (400 MHz, DMSO- $d_6$ ):  $\delta$  9.65 (s, 1H), 8.87 (s, 1H), 8.70 (s, 1H), 8.63 (br s, 1H), 8.30 (d, 2H,  $^3J=9.1$  Hz), 7.28 (m, 1H), 7.17-7.08 (m, 4H), 6.68-6.66 (m, 1H), 3.80 (s, 3H), 3.44-3.42 and 1.67-1.65 (m, 10H);  $^{13}\text{C}$  NMR (100 MHz, DMSO- $d_6$ ):  $\delta$  161.1 (C), 153.7 (C), 145.7 (CH), 143.7 (C), 143.1 (CH), 134.5 (C), 132.5 (C), 130.9 (CH), 129.7 (2CH), 129.2 (C), 124.7 (C), 115.4 (2CH), 112.6 (CH), 108.7 (CH), 106.4 (CH), 55.9 (CH $_3$ ), 49.1 (2CH $_2$ ), 25.8 (2CH $_2$ ), 24.9 (CH $_2$ ); IR (ATR): 3256, 3023, 2932, 2846, 1609, 1554, 1544, 1505, 1323, 1247, 1213, 1012, 951  $\text{cm}^{-1}$ ; MS (ESI)  $m/z$  (%) = 412.4 (100)  $[\text{M}+\text{H}]^+$ . Anal. calcd for  $\text{C}_{25}\text{H}_{25}\text{N}_5\text{O}$ : C 72.97, H 6.12, N 17.02. Found: C 72.88, H 6.15, N 17.08.

***N*-(3-Ethynylphenyl)-2-phenylpyrido[3,4-*b*]pyrazin-5-amine (14c)**

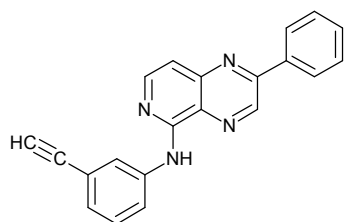

Compound **14c** was obtained following the representative procedure, using 5-chloro-2-phenylpyrido[3,4-*b*]pyrazine **12a** (121 mg, 0.5 mmol) and 3-ethynylaniline (71 mg, 0.6 mmol), as a yellow powder (79 mg, 49%);  $R_f$  0.68 ( $\text{CH}_2\text{Cl}_2/\text{EtOH}$  19:1); Mp 152-153  $^\circ\text{C}$ ;  $^1\text{H}$  NMR (400 MHz, DMSO- $d_6$ ):  $\delta$  9.97 (br s, 1H), 9.58 (s, 1H), 8.41-8.38 (m, 4H), 8.14 (dd, 1H,  $^3J=8.1$  Hz,  $^4J=1.0$  Hz), 7.69-7.65 (m, 3H), 7.44-7.38 (m, 2H), 7.18 (d, 1H,  $^3J=8.1$  Hz), 4.22 (s, 1H);  $^{13}\text{C}$  NMR (100 MHz, DMSO- $d_6$ ):  $\delta$  155.9 (C), 154.2 (C), 147.2 (CH), 146.4 (C), 142.7 (CH), 141.3 (C), 136.4 (C), 132.1 (CH), 130.1 (2CH), 129.8 (2CH), 128.8 (2CH), 128.2 (C), 126.3 (CH), 123.6 (CH), 122.7 (C), 121.7 (CH), 113.2 (CH), 84.8 (C), 81.2 (CH); IR (ATR): 3364, 3281, 2249, 1597, 1571, 1533, 1435, 1392, 1276, 1070  $\text{cm}^{-1}$ ; MS (ESI)  $m/z$  (%) = 323.4 (100)  $[\text{M}+\text{H}]^+$ . Anal. calcd for  $\text{C}_{21}\text{H}_{14}\text{N}_4$ : C 78.24, H 4.38, N 17.38. Found: C 78.27, H 4.37, N 17.36.

***N*-(2-Methoxyphenyl)-2-phenylpyrido[3,4-*b*]pyrazin-5-amine (14d)**

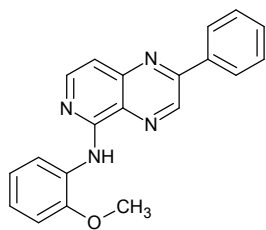

Compound **14d** was obtained following the representative procedure, using 5-chloro-2-phenylpyrido[3,4-*b*]pyrazine **12a** (121 mg, 0.5 mmol) and 2-methoxyaniline (68  $\mu$ L, 0.6 mmol), as a yellow powder (85 mg, 52%);  $R_f$  0.63 ( $\text{CH}_2\text{Cl}_2/\text{EtOH}$  19:1); Mp 151-152  $^\circ\text{C}$ ;  $^1\text{H}$  NMR (400 MHz,  $\text{DMSO-}d_6$ ):  $\delta$  9.65 (s, 1H), 9.61 (br s, 1H), 8.97-8.93 (m, 1H), 8.42-8.39 (m, 3H), 7.69-7.66 (m, 3H), 7.38 (d, 1H,  $^3J=6.1$  Hz), 7.20-7.16 (m, 1H), 7.10-7.06 (m, 2H), 4.03 (s, 3H);  $^{13}\text{C}$  NMR (100 MHz,  $\text{DMSO-}d_6$ ):  $\delta$  156.1 (C), 153.5 (C), 148.9 (C), 147.3 (CH), 146.2 (C), 143.3 (CH), 136.4 (C), 132.1 (CH), 130.2 (2CH), 129.7 (C), 128.8 (2CH), 128.2 (C), 123.1 (CH), 121.6 (CH), 119.0 (CH), 112.9 (CH), 111.5 (CH), 57.0 ( $\text{CH}_3$ ); IR (ATR): 3366, 3047, 3016, 2954, 1602, 1568, 1535, 1483, 1390, 1230, 1122, 1022, 906  $\text{cm}^{-1}$ ; MS (ESI)  $m/z$  (%) = 329.3 (100)  $[\text{M}+\text{H}]^+$ . Anal. calcd for  $\text{C}_{20}\text{H}_{16}\text{N}_4\text{O}$ : C 73.15, H 4.91, N 17.06. Found: C 73.17, H 4.92, N 17.03.

#### ***N*-(3-Methoxyphenyl)-2-phenylpyrido[3,4-*b*]pyrazin-5-amine (14e)**

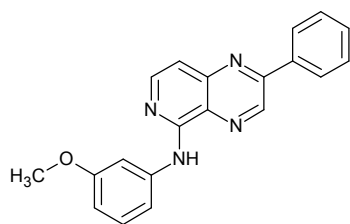

Compound **14e** was obtained following the representative procedure, using 5-chloro-2-phenylpyrido[3,4-*b*]pyrazine **12a** (121 mg, 0.5 mmol) and 3-methoxyaniline (74 mg, 0.6 mmol), as a yellow powder (82 mg, 50%);  $R_f$  0.52 ( $\text{CH}_2\text{Cl}_2/\text{EtOH}$  19:1); Mp 164-166  $^\circ\text{C}$ ;  $^1\text{H}$  NMR (400 MHz,  $\text{DMSO-}d_6$ ):  $\delta$  9.77 (br s, 1H), 9.56 (s, 1H), 8.41-8.38 (m, 2H), 8.37 (d, 1H,  $^3J=5.9$  Hz), 7.88 (t, 1H,  $^4J=2.1$  Hz), 7.76 (dd, 1H,  $^3J=8.0$  Hz,  $^4J=1.5$  Hz), 7.69-7.66 (m, 3H), 7.35 (d, 1H,  $^3J=5.9$  Hz), 7.29 (t, 1H,  $^3J=8.0$  Hz), 6.66 (dd, 1H,  $^3J=8.1$  Hz,  $^4J=2.3$  Hz), 3.82 (s, 3H,  $\text{CH}_3$ );  $^{13}\text{C}$  NMR (100 MHz,  $\text{DMSO-}d_6$ ):  $\delta$  160.4 (C), 155.8 (C), 154.2 (C), 147.3 (CH), 146.4 (C), 142.6 (CH), 142.2 (C), 136.4 (C), 132.1 (CH), 130.1 (2CH), 128.8 (2CH), 128.2 (C), 113.2 (CH), 112.8 (CH), 108.5 (CH), 106.8 (CH), 55.9 ( $\text{CH}_3$ ); IR (ATR): 3356, 3043, 2962, 1600, 1566, 1531, 1489, 1436, 1388, 1334, 1257, 1176, 1045, 953  $\text{cm}^{-1}$ ; MS (ESI)  $m/z$  (%) = 329.2 (100)  $[\text{M}+\text{H}]^+$ . Anal. calcd for  $\text{C}_{20}\text{H}_{16}\text{N}_4\text{O}$ : C 73.15, H 4.91, N 17.06. Found: C 73.12, H 4.90, N 17.10.

#### ***N*-(4-Methoxyphenyl)-2-phenylpyrido[3,4-*b*]pyrazin-5-amine (14f)**

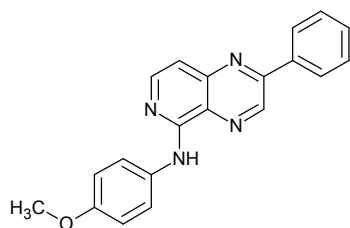

Compound **14f** was obtained following the representative procedure, using 5-chloro-2-phenylpyrido[3,4-*b*]pyrazine **12a** (121 mg, 0.5 mmol) and 4-methoxyaniline (69  $\mu$ L, 0.6 mmol), as a yellow powder (82 mg, 50%);  $R_f$  0.67 ( $\text{CH}_2\text{Cl}_2/\text{EtOH}$  19:1); Mp 156-158  $^\circ\text{C}$ ;  $^1\text{H}$  NMR (400 MHz,  $\text{DMSO-}d_6$ ):  $\delta$  9.71 (br s, 1H), 9.53 (s,

1H), 8.40-8.38 (m, 2H), 8.29 (d, 1H,  $^3J=5.8$  Hz), 7.99 (d, 2H,  $^3J=9.1$  Hz), 7.68-7.66 (m, 3H), 7.27 (d, 1H,  $^3J=6.1$  Hz), 6.98 (d, 2H,  $^3J=8.9$  Hz), 4.03 (s, 3H).  $^{13}\text{C}$  NMR (100 MHz, DMSO- $d_6$ ):  $\delta$  155.8 (C), 154.5 (C), 147.6 (CH), 146.7 (C), 142.5 (CH), 136.7 (C), 134.3 (C), 131.9 (CH), 130.0 (2CH), 128.7 (2CH), 128.1 (C), 122.8 (2CH), 122.2 (C), 114.6 (2CH), 111.8 (CH), 55.9 (CH $_3$ ); IR (ATR): 3373, 3064, 3024, 2995, 2935, 1600, 1575, 1531, 1504, 1438, 1396, 1300, 1238, 1172, 1105, 1035, 829  $\text{cm}^{-1}$ ; MS (ESI)  $m/z$  (%) = 329.2 (100) [M+H] $^+$ . Anal. calcd for C $_{20}$ H $_{16}$ N $_4$ O: C 73.15, H 4.91, N 17.06. Found: C 73.18, H 4.90, N 17.04.

### 2-Phenyl-N-(4-piperidin-1-ylphenyl)pyrido[3,4-b]pyrazin-5-amine (14g)

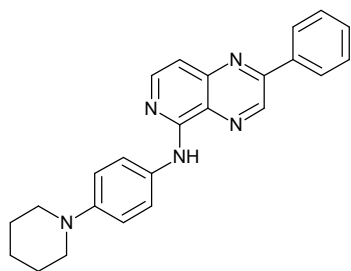

Compound **14g** was obtained following the representative procedure, using 5-chloro-2-phenylpyrido[3,4-*b*]pyrazine **12a** (121 mg, 0.5 mmol) and 4-(piperidin-1-yl)aniline (106 mg, 0.6 mmol), as a red powder (107 mg, 56%);  $R_f$  0.55 (CH $_2$ Cl $_2$ /EtOH 19:1); Mp 172-174  $^{\circ}\text{C}$ ;  $^1\text{H}$  NMR (400 MHz, DMSO- $d_6$ ):  $\delta$  9.61 (br s, 1H), 9.51 (s, 1H), 8.39-8.37 (m, 2H), 8.28 (d, 1H,  $^3J=8.9$  Hz), 7.91 (d, 2H,  $^3J=8.9$  Hz), 7.68-7.65 (m, 3H), 7.24 (d, 1H,  $^3J=5.8$  Hz), 6.98 (d, 2H,  $^3J=8.7$  Hz), 3.13-3.12 (m, 4H), 1.68-1.67 (m, 4H), 1.58-1.56 (m, 2H);  $^{13}\text{C}$  NMR (100 MHz, DMSO- $d_6$ ):  $\delta$  155.7 (C), 154.5 (C), 147.8 (C), 147.7 (CH), 146.6 (C), 142.2 (CH), 136.5 (C), 132.8 (C), 132.0 (CH), 130.1 (2CH), 128.7 (2CH), 128.3 (C), 122.3 (2CH), 117.1 (2CH), 111.6 (CH), 51.2 (2CH $_2$ ), 26.3 (2CH $_2$ ), 24.8 (CH $_2$ ); IR (ATR): 2934, 2851, 1736, 1600, 1582, 1530, 1512, 1460, 1384, 1234, 1215, 1105, 1024, 914  $\text{cm}^{-1}$ ; MS (ESI)  $m/z$  (%) = 382.4 (100) [M+H] $^+$ . Anal. calcd for C $_{24}$ H $_{23}$ N $_5$ : C 75.56, H 6.08, N 18.26. Found: C 75.58, H 6.09, N 18.23.

### N-(4-Morpholin-4-ylphenyl)-2-phenylpyrido[3,4-b]pyrazin-5-amine (14h)

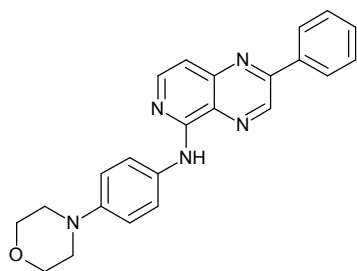

Compound **14h** was obtained following the representative procedure, using 5-chloro-2-phenylpyrido[3,4-*b*]pyrazine **12a** (121 mg, 0.5 mmol) and 4-(morpholin-4-yl)aniline (107 mg, 0.6 mmol), as a red powder (111 mg, 58%);  $R_f$  0.36 (CH $_2$ Cl $_2$ /EtOH 19:1); Mp 210-212  $^{\circ}\text{C}$ ;  $^1\text{H}$  NMR (400 MHz, DMSO- $d_6$ ):  $\delta$  9.65 (br s, 1H), 9.52 (s, 1H), 8.30-8.38 (m, 2H), 8.28 (d, 1H,  $^3J=6.2$  Hz), 7.95 (d, 2H,  $^3J=9.1$  Hz), 7.68-7.65 (m, 3H), 7.25 (d, 1H,  $^3J=6.4$  Hz), 6.99 (d, 2H,  $^3J=9.0$  Hz), 3.79-3.77 (m, 4H), 3.14-3.10 (m, 4H);  $^{13}\text{C}$  NMR (100 MHz, DMSO- $d_6$ ):  $\delta$  155.7 (C), 154.5 (C), 147.8 (C), 147.7 (CH), 146.6 (C), 142.3 (CH), 136.5 (C), 133.4 (C), 132.0 (CH), 130.1 (2CH), 128.7 (2CH), 128.3 (C), 122.3 (2CH), 116.3 (2CH), 111.7 (CH), 67.1 (2CH $_2$ ), 50.1 (2CH $_2$ ); IR (ATR): 3354, 3059, 3024, 2945, 2821, 1597, 1583, 1529, 1510, 1483, 1396, 1263, 1224, 1114, 1068, 920  $\text{cm}^{-1}$ ; MS (ESI)  $m/z$  (%) = 384.3 (100) [M+H] $^+$ . Anal. calcd for C $_{23}$ H $_{21}$ N $_5$ O: C 72.04, H 5.52, N 18.36. Found: C 72.08, H 5.50, N 18.34.

### 2-(4-Methoxyphenyl)-N-(4-piperidin-1-ylphenyl)pyrido[3,4-b]pyrazin-5-amine (14i)

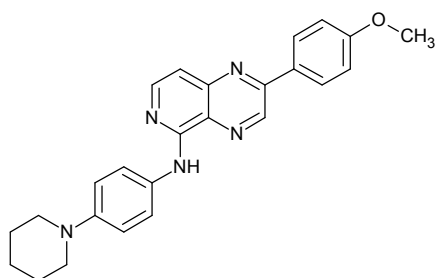

Compound **14i** was obtained following the representative procedure, using 5-chloro-2-(4-methoxyphenyl)pyrido[3,4-*b*]pyrazine **12b** (136 mg, 0.5 mmol) and 4-(piperidin-1-yl)aniline (106 mg, 0.6 mmol), as a red powder (128 mg, 62%);  $R_f$  0.57 (CH<sub>2</sub>Cl<sub>2</sub>/EtOH 19:1); Mp 170-172 °C; <sup>1</sup>H NMR (400 MHz, DMSO-*d*<sub>6</sub>): δ 9.53 (br s, 1H), 9.47 (s, 1H), 8.38 (d, 2H, <sup>3</sup>J=8.9 Hz), 8.24 (d, 1H, <sup>3</sup>J=5.8 Hz), 7.90 (d, 2H, <sup>3</sup>J=9.1 Hz), 7.21 (d, 2H, <sup>3</sup>J=8.9 Hz), 7.19 (d, 1H, <sup>3</sup>J=6.1 Hz), 6.97 (d, 2H, <sup>3</sup>J=9.1 Hz), 3.92 (s, 3H), 3.13-3.10 (m, 4H), 1.68-1.66 (m, 4H), 1.58-1.55 (m, 2H); <sup>13</sup>C NMR (100 MHz, DMSO-*d*<sub>6</sub>): δ 162.7 (C), 155.2 (C), 154.4 (C), 148.5 (C), 147.5 (CH), 146.6 (C), 141.8 (CH), 132.8 (C), 130.3 (2CH), 128.8 (C), 127.7 (C), 122.2 (2CH), 117.1 (2CH), 115.6 (2CH), 111.6 (CH), 56.4 (CH<sub>3</sub>), 51.2 (2CH<sub>2</sub>), 26.3 (2CH<sub>2</sub>), 24.8 (CH<sub>2</sub>); IR (ATR): 3371, 3024, 2924, 2846, 1593, 1581, 1512, 1523, 1448, 1384, 1251, 1217, 1174, 1022, 914 cm<sup>-1</sup>; MS (ESI)  $m/z$  (%) = 412.4 (100) [M+H]<sup>+</sup>. Anal. calcd for C<sub>25</sub>H<sub>25</sub>N<sub>5</sub>O: C 72.97, H 6.12, N 17.02. Found: C 72.98, H 6.11, N 17.02.

### 2-(4-Methoxyphenyl)-N-(4-morpholin-4-ylphenyl)pyrido[3,4-b]pyrazin-5-amine (14j)

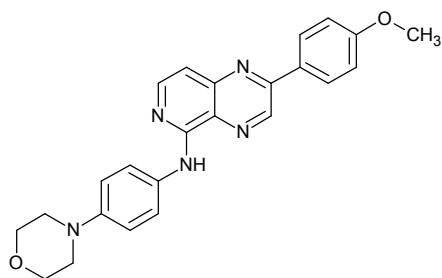

Compound **14j** was obtained following the representative procedure, using 5-chloro-2-(4-methoxyphenyl)pyrido[3,4-*b*]pyrazine **12b** (136 mg, 0.5 mmol) and 4-(morpholin-4-yl)aniline (107 mg, 0.6 mmol), as an orange powder (114 mg, 55%);  $R_f$  0.49 (CH<sub>2</sub>Cl<sub>2</sub>/EtOH 19:1); Mp 204-206 °C; <sup>1</sup>H NMR (400 MHz, DMSO-*d*<sub>6</sub>): δ 9.57 (br s, 1H), 9.48 (s, 1H), 8.38 (d, 2H, <sup>3</sup>J=9.2 Hz), 8.25 (d, 1H, <sup>3</sup>J=6.1 Hz), 7.95 (d, 2H, <sup>3</sup>J=9.2 Hz), 7.23-7.17 (m, 3H), 6.99 (d, 1H, <sup>3</sup>J=9.0 Hz), 3.92 (s, 3H), 3.81-3.77 and 3.13-3.08 (m, 8H); <sup>13</sup>C NMR (100 MHz, DMSO-*d*<sub>6</sub>): δ 162.1 (C), 155.4 (C), 154.2 (C), 148.7 (C), 147.6 (CH), 146.4 (C), 141.1 (CH), 133.1 (C), 130.1 (2CH), 128.2 (C), 127.5 (C), 122.4 (2CH), 117.3 (2CH), 116.1 (2CH), 111.4 (CH), 65.9 (2CH<sub>2</sub>), 55.2 (CH<sub>3</sub>), 48.9 (2CH<sub>2</sub>); IR (ATR): 3352, 3005, 2954, 2927, 1598, 1538, 1531, 1510, 1327, 1286, 1253, 1168, 1114, 1039, 9290 cm<sup>-1</sup>; MS (ESI)  $m/z$  (%) = 414.3 (100) [M+H]<sup>+</sup>. Anal. calcd for C<sub>24</sub>H<sub>23</sub>N<sub>5</sub>O<sub>2</sub>: C 69.72, H 5.61, N 16.94. Found: C 69.68, H 5.62, N 16.97.

### Synthesis of 2,7- and 3,7-disubstituted pyrido[3,4-*b*]pyrazines 18a-c and 19

#### N-(3-Methoxyphenyl)-2-phenylpyrido[3,4-*b*]pyrazin-7-amine (18a)

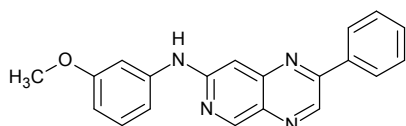

Compound **18a** was obtained following the representative procedure, using 7-chloro-2-phenylpyrido[3,4-*b*]pyrazine **16** (121 mg, 0.5 mmol) and 3-methoxyaniline (74 mg, 0.6 mmol), as a yellow powder (83 mg, 52%);  $R_f$  0.51 (CH<sub>2</sub>Cl<sub>2</sub>/EtOH 19:1); Mp 180-182 °C; <sup>1</sup>H NMR (400 MHz, DMSO-*d*<sub>6</sub>): δ 9.54 (br s, 1H), 9.36 (s, 1H), 9.22 (s, 1H), 8.39-8.36 (m, 2H), 7.66-7.64 (m, 3H), 7.33-7.20 (m, 4H), 6.63 (d, 1H, <sup>3</sup>J=7.8 Hz), 3.82 (s, 3H); <sup>13</sup>C NMR (100 MHz, DMSO-*d*<sub>6</sub>): δ 160.8 (C), 156.6 (C), 156.0 (C), 153.6 (CH), 147.2 (C), 143.0 (C), 142.4 (CH), 136.6 (C), 132.8 (C), 132.1 (CH), 130.6 (CH), 130.1 (2CH), 128.8 (2CH), 112.5 (CH), 107.9 (CH), 106.0 (CH), 101.3 (CH), 55.9 (CH<sub>3</sub>); IR (ATR): 3235, 3064, 3032, 2964, 1616, 1593, 1552, 1490, 1456, 1425, 1319, 1186, 1157, 1037, 960 cm<sup>-1</sup>; MS (ESI)  $m/z$  (%) = 329.3(100) [M+H]<sup>+</sup>. Anal. calcd for C<sub>20</sub>H<sub>16</sub>N<sub>4</sub>O: C 73.15, H 4.91, N 17.06. Found: C 73.12, H 4.90, N 17.10.

### **2-Phenyl-N-(4-piperidin-1-ylphenyl)pyrido[3,4-*b*]pyrazin-7-amine (18b)**

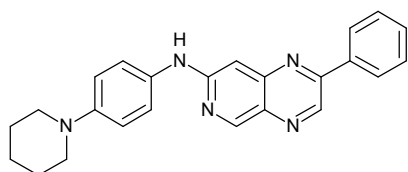

Compound **18b** was obtained following the representative procedure, using 7-chloro-2-phenylpyrido[3,4-*b*]pyrazine **16** (121 mg, 0.5 mmol) and 4-(piperidin-1-yl)aniline (106 mg, 0.6 mmol), as an orange powder (107 mg, 56%);  $R_f$  0.42 (CH<sub>2</sub>Cl<sub>2</sub>/EtOH 19:1); Mp 237-239 °C; <sup>1</sup>H NMR (400 MHz, DMSO-*d*<sub>6</sub>): δ 9.28 (s, 1H), 9.21 (br s, 1H), 9.14 (s, 1H), 8.36-8.32 (m, 2H), 7.69-7.62 (m, 3H), 7.40 (d, 2H, <sup>3</sup>J=8.6 Hz), 7.03-6.99 (m, 3H), 3.24-3.20 and 1.62-1.60 (m, 10H); <sup>13</sup>C NMR (100 MHz, DMSO-*d*<sub>6</sub>): δ 157.8 (C), 155.9 (C), 153.9 (CH), 148.8 (C), 147.5 (C), 141.5 (CH), 136.7 (C), 133.0 (C), 132.5 (C), 132.0 (CH), 130.0 (2CH), 128.7 (2CH), 122.9 (2CH), 117.7 (2CH), 98.5 (CH), 51.2 (CH<sub>2</sub>), 26.3 (CH<sub>2</sub>), 24.8 (CH<sub>2</sub>); IR (ATR): 3205, 3019, 2928, 2853, 1607, 1537, 1512, 1450, 1236, 1209, 1166, 1126, 1024, 916 cm<sup>-1</sup>; MS (ESI)  $m/z$  (%) = 382.4 (100) [M+H]<sup>+</sup>. Anal. calcd for C<sub>24</sub>H<sub>23</sub>N<sub>5</sub>: C 75.56, H 6.08, N 18.36. Found: C 75.62, H 6.07, N 17.31.

### **N-(4-Morpholin-4-ylphenyl)-2-phenylpyrido[3,4-*b*]pyrazin-7-amine (18c)**

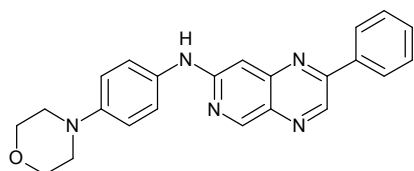

Compound **18c** was obtained following the representative procedure, using 7-chloro-2-phenylpyrido[3,4-*b*]pyrazine **16** (121 mg, 0.5 mmol) and 4-(morpholin-4-yl)aniline (107 mg, 0.6 mmol), as a red powder (105 mg, 55%);  $R_f$  0.47 (CH<sub>2</sub>Cl<sub>2</sub>/EtOH 19:1); Mp 283-285 °C; <sup>1</sup>H NMR (400 MHz, DMSO-*d*<sub>6</sub>): δ 9.28 (s, 1H), 9.25 (br s, 1H), 9.14 (s, 1H), 8.35-8.33 (m, 2H), 7.65-7.63 (m, 3H), 7.44 (d, 2H, <sup>3</sup>J=9.1 Hz), 7.05-7.00 (m, 2H), 3.74-3.71 (m, 4H), 2.91-2.89 (m, 4H). <sup>13</sup>C NMR (100 MHz, DMSO-*d*<sub>6</sub>): δ 157.8 (C), 156.0 (C), 154.0 (CH), 148.0 (C), 147.5 (C), 141.6 (CH), 136.7 (C), 133.7 (C), 132.6 (C), 132.0 (CH), 130.1 (2CH), 128.8 (2CH), 122.8 (2CH), 117.0 (2CH), 98.7 (CH), 67.1 (CH<sub>2</sub>), 50.0 (CH<sub>2</sub>); IR (ATR): 3217, 3030, 2951, 2852, 1608, 1541, 1512, 1444, 1255, 1228, 1166, 1112, 1060, 923 cm<sup>-1</sup>; MS (ESI)  $m/z$  (%) = 384.4 (100) [M+H]<sup>+</sup>. Anal. calcd for C<sub>23</sub>H<sub>21</sub>N<sub>5</sub>O: C 72.04, H 5.52, N 18.26. Found: C 72.00, H 5.53, N 18.29.

### **3-Phenyl-N-(4-piperidin-1-ylphenyl)pyrido[3,4-*b*]pyrazin-7-amine (19)**

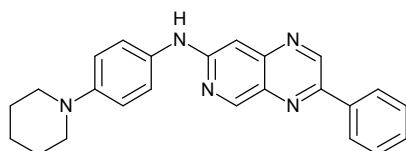

Compound **18b** was obtained following the representative procedure, using 7-chloro-3-phenylpyrido[3,4-*b*]pyrazine **16** (121 mg, 0.5 mmol) and 4-(piperidin-1-yl)aniline (109 mg, 0.6 mmol), as a red powder (110 mg, 58%);  $R_f$  0.53 ( $\text{CH}_2\text{Cl}_2/\text{EtOH}$  19:1); Mp 247-249 °C;  $^1\text{H}$  NMR (400 MHz,  $\text{DMSO-}d_6$ ):  $\delta$  9.54 (s, 1H), 9.25 (br s, 1H), 9.19 (s, 1H), 8.29 (d, 2H,  $^3J=7.4$  Hz), 7.64-7.56 (m, 3H), 7.40 (d, 2H,  $^3J=8.8$  Hz), 7.06 (s, 1H), 7.00 (d, 2H,  $^3J=8.8$  Hz), 3.14-3.11 (m, 4H), 1.71-1.65 (m, 4H), 1.59-1.56 (m, 2H);  $^{13}\text{C}$  NMR (100 MHz,  $\text{DMSO-}d_6$ ):  $\delta$  157.1 (C), 154.3 (CH), 149.5 (CH), 148.8 (C), 148.7 (C), 146.8 (C), 136.9 (C), 133.0 (C), 132.6 (C), 130.8 (CH), 130.0 (2CH), 127.7 (2CH), 122.6 (2CH), 117.7 (2CH), 98.7 (CH), 51.2 ( $\text{CH}_2$ ), 26.3 ( $\text{CH}_2$ ), 24.8 ( $\text{CH}_2$ ); IR (ATR): 3215, 3028, 2934, 2850, 1587, 1512, 1433, 1348, 1217, 1024, 950  $\text{cm}^{-1}$ ; MS (ESI)  $m/z$  (%) = 382.3 (100)  $[\text{M}+\text{H}]^+$ . Anal. calcd for  $\text{C}_{24}\text{H}_{23}\text{N}_5$ : C 75.56, H 6.08, N 18.36. Found: C 75.58, H 6.07, N 18.35.

## References

30 S. Kano and Y. Yuasa, *J. Heterocycl. Chem.*, 1983, **20**, 769-770.



## Biological evaluation

### *In vitro* kinase inhibition assay

Recombinant kinases were purchased from Millipore or ProQinase. An AlphaScreen Protein-A Detection Kit (PerkinElmer) was used to quantify kinase activity. For the assessment of IC<sub>50</sub> values, compounds were tested at ten final concentrations between 3.16 nM and 100 μM. Each kinase, 10 μM ATP, kinase substrate, and the test compound were incubated for 1 h on a 384-well Optiplate in a final volume of 15 μL. The kinase reaction was stopped by adding 10 μL Alpha Beadmix. The readout was performed the following morning using an Envision reader (PerkinElmer). IC<sub>50</sub> values were calculated with GraphPad Prism software. Kinase testing was performed by the Target Lab (Dr. Seipelt, Preclinical Development) at Æterna Zentaris GmbH, Frankfurt/Main (Germany).

**Table 4** Inhibitory activity against a panel of seven protein kinases of 2,8-disubstituted pyrido[3,4-*b*]pyrazines **20a-p**

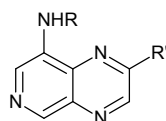

| Compounds  | R                                                    | R'                                              | IC <sub>50</sub> (μM) <sup>a</sup> |       |       |       |       |       |       |
|------------|------------------------------------------------------|-------------------------------------------------|------------------------------------|-------|-------|-------|-------|-------|-------|
|            |                                                      |                                                 | ERK2                               | HIPK1 | Pim1  | KDR   | TrkA  | c-Abl | Yes   |
| <b>20a</b> | 3-MeOC <sub>6</sub> H <sub>4</sub> NHCO              | C <sub>6</sub> H <sub>5</sub>                   | >100                               | 21.53 | 12.42 | >100  | >100  | 15.06 | 19.21 |
| <b>20b</b> | 4-MeOC <sub>6</sub> H <sub>4</sub> NHCO              | C <sub>6</sub> H <sub>5</sub>                   | >31.6                              | >100  | >100  | >100  | >31.6 | >100  | >100  |
| <b>20c</b> | CH <sub>3</sub> CH <sub>2</sub> NHCO                 | C <sub>6</sub> H <sub>5</sub>                   | >100                               | >100  | >100  | >100  | >100  | >100  | >100  |
| <b>20d</b> | CH <sub>2</sub> =CHCH <sub>2</sub> NHCO              | C <sub>6</sub> H <sub>5</sub>                   | >100                               | >100  | >100  | >100  | >100  | >100  | >100  |
| <b>20e</b> | 3-Cl-4-FC <sub>6</sub> H <sub>3</sub>                | C <sub>6</sub> H <sub>5</sub>                   | >100                               | >100  | >100  | >100  | >100  | >100  | >100  |
| <b>20f</b> | 3-ethynylC <sub>6</sub> H <sub>4</sub>               | C <sub>6</sub> H <sub>5</sub>                   | >100                               | >100  | >100  | >100  | >100  | >100  | >100  |
| <b>20g</b> | 2-MeOC <sub>6</sub> H <sub>4</sub>                   | C <sub>6</sub> H <sub>5</sub>                   | >100                               | 2.01  | >100  | 2.24  | 1.97  | 2.94  | 3.96  |
| <b>20h</b> | 3-MeOC <sub>6</sub> H <sub>4</sub>                   | C <sub>6</sub> H <sub>5</sub>                   | 9.15                               | 9.83  | >100  | 18.9  | 20.8  | 15.8  | 19.8  |
| <b>20i</b> | 4-MeOC <sub>6</sub> H <sub>4</sub>                   | C <sub>6</sub> H <sub>5</sub>                   | 9.01                               | 7.70  | 14.5  | 21.4  | 13.7  | 10.7  | 8.12  |
| <b>20j</b> | 4-(piperidin-1-yl)C <sub>6</sub> H <sub>4</sub>      | C <sub>6</sub> H <sub>5</sub>                   | 2.02                               | 2.59  | 2.61  | 1.56  | 3.23  | 2.16  | 5.56  |
| <b>20k</b> | 4-(morpholin-4-yl)C <sub>6</sub> H <sub>4</sub>      | C <sub>6</sub> H <sub>5</sub>                   | 8.43                               | 8.15  | 8.30  | 6.12  | 5.32  | 5.27  | 5.11  |
| <b>20l</b> | 2,5-(MeO) <sub>2</sub> C <sub>6</sub> H <sub>3</sub> | 4-MeOC <sub>6</sub> H <sub>4</sub>              | 3.79                               | 13.1  | 8.57  | 1.60  | 1.45  | 1.37  | 2.01  |
| <b>20m</b> | 4-(piperidin-1-yl)C <sub>6</sub> H <sub>4</sub>      | 4-MeOC <sub>6</sub> H <sub>4</sub>              | 3.13                               | 3.21  | 2.83  | 2.05  | 3.72  | 2.27  | 5.34  |
| <b>20n</b> | 4-(morpholin-4-yl)C <sub>6</sub> H <sub>4</sub>      | 4-MeOC <sub>6</sub> H <sub>4</sub>              | 4.26                               | 4.02  | 4.40  | 3.31  | 2.48  | 2.49  | 2.41  |
| <b>20o</b> | C <sub>6</sub> H <sub>5</sub>                        | 4-(piperidin-1-yl)C <sub>6</sub> H <sub>4</sub> | 12.21                              | 11.85 | 31.20 | 11.05 | 7.79  | 6.84  | 8.82  |
| <b>20p</b> | 3-MeOC <sub>6</sub> H <sub>4</sub>                   | 4-(piperidin-1-yl)C <sub>6</sub> H <sub>4</sub> | 16.63                              | 12.65 | 11.34 | 8.84  | 9.36  | 7.71  | 11.10 |

<sup>a</sup> Values are the mean of at least three independent determinations and are within ± 15% SD.
